# Supplementary material
Source: Springer Nature journal article supplement (https://mijn.bsl.nl/resource/supplementary/13047_2013_592_MOESM11_ESM.pdf/7113170)

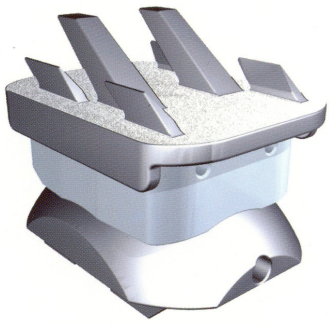

**Ramses**

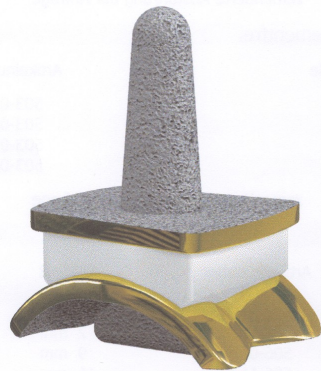

**Alpha OSG**

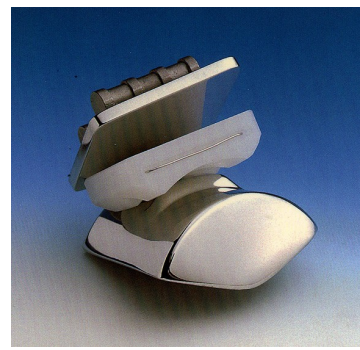

**Star**

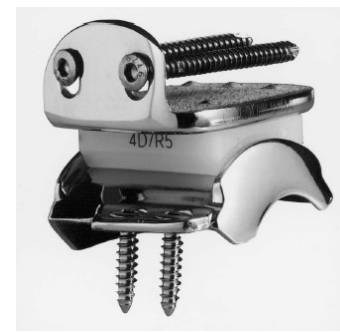

**Hintegra**

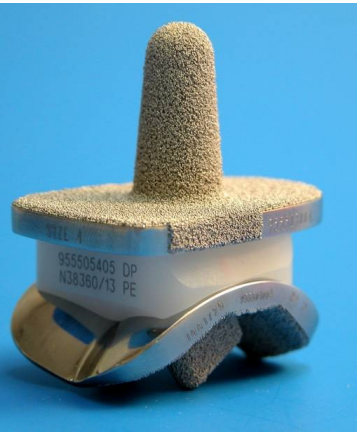

**Mobility**

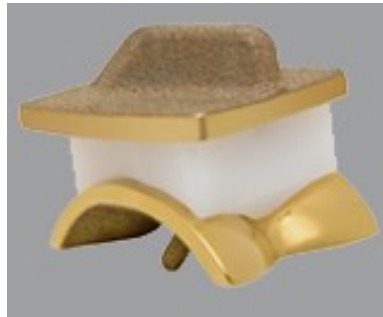

**CCI Evolution**

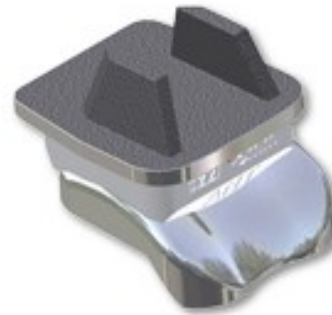

**Taric**

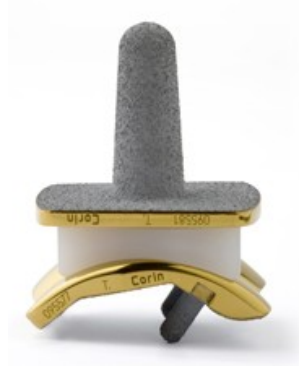

**Zenith**

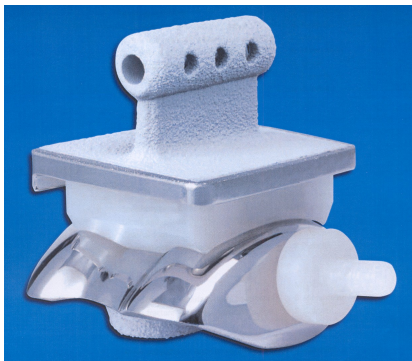

**Salto**

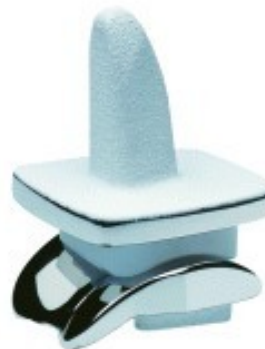

**A.E.S**

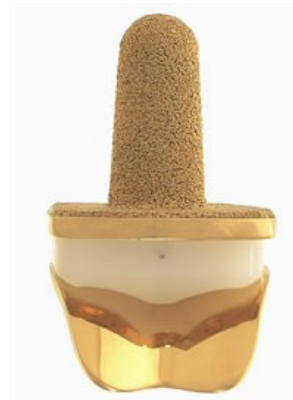

**Buechel-Pappas**

Supplement: MOESM11 [file 7113170]
